# Supplementary material
Source: PubMed Central journal article supplement (PMC6388395)
Supplement: NIHMS1521158-supplement-Sup_1.pdf [file NIHMS1521158-supplement-Sup_1.pdf]

## Supporting Information

**Table S1 Biological Indicator Test Results**

| Test ID  | <i>G.s.</i> BI results (# exhibiting growth/# tested) |
|----------|-------------------------------------------------------|
| Test C1  | 0/3                                                   |
| Test C2  | 0/9                                                   |
| Test C3  | 0/9                                                   |
| Test C4  | 0/9                                                   |
| Test C5  | 0/9                                                   |
| Test C6  | 0/9                                                   |
| Test C7  | 1/6                                                   |
| Test C8  | 1/9                                                   |
| Test C9  | 0/9                                                   |
| Test C10 | 0/9                                                   |

- All tests used *G. stearothermophilus* (var. 12980) BIs, nominally 10<sup>6</sup> CFU per stainless steel carrier. Each disc was enclosed in a Tyvek pouch.
- The BIs were produced from Mesa Labs, Bozeman MT, USA, and cultured/analyzed per manufacturer instructions, incubated 7 days at 55-60 °C.
- All COMMANDER tests utilized 3 BIs for each of the 3 test chamber locations (n=9) - co-located with coupons - except as noted in table.
- There were only 2 BIs showing growth (incomplete inactivation of carrier) out of a total of 81 tested.

**Figure S1 Photos of humidifiers used in testing**

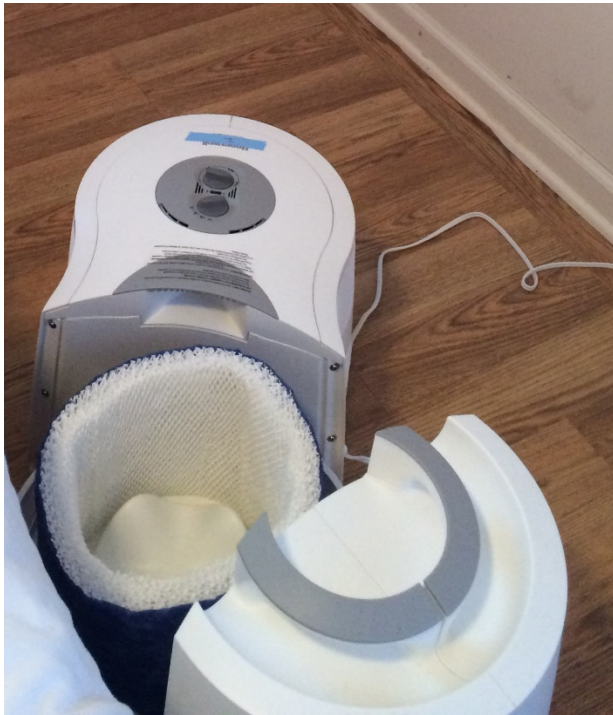

Sponge/Evaporative type humidifier

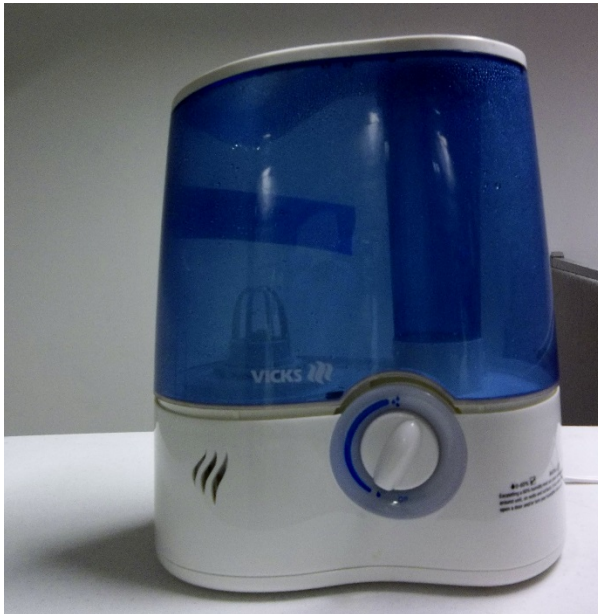

Ultrasonic humidifier

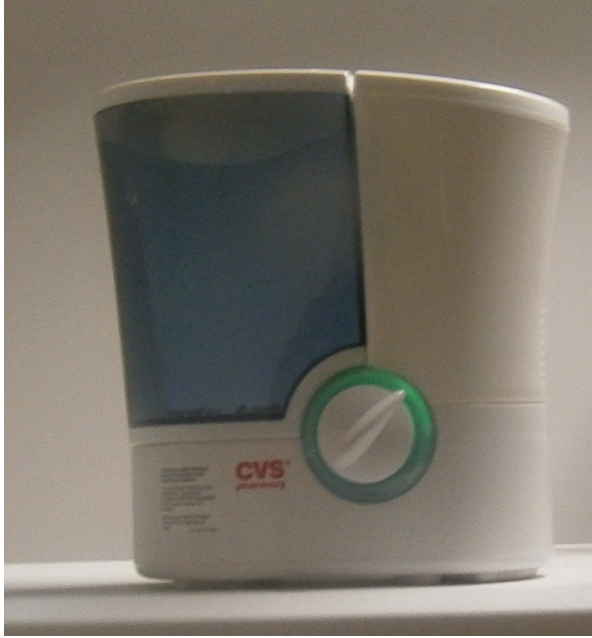

Heated vaporizer

**Table S2 Decontamination efficacy results, average  $\pm$  SD log reduction values, by test #/material/chamber location**

| <b>Test #</b>    | <b>Above Ceiling</b> | <b>On Desk</b> | <b>Under Desk</b> | <b>avg</b> | <b>sd</b> |
|------------------|----------------------|----------------|-------------------|------------|-----------|
| <b>C1</b>        |                      |                |                   |            |           |
| Carpet           | 5.63                 | 7.72           | 7.75              | 7.04       | 1.21      |
| Ceiling Tile     | 5.84                 | 6.77           | 6.77              | 6.46       | 0.54      |
| Concrete         | 0.64                 | 2.65           | 2.42              | 1.90       | 1.10      |
| Glass            | 4.39                 | 7.48           | 7.48              | 6.45       | 1.78      |
| Drywall          | 5.15                 | 6.56           | 5.98              | 5.90       | 0.71      |
| Laminate         | 5.35                 | 7.56           | 7.55              | 6.82       | 1.27      |
| <b>C2</b>        |                      |                |                   |            |           |
| Carpet           | 7.61                 | 7.61           | 7.61              | 7.61       | 0.00      |
| Ceiling Tile     | 6.77                 | 6.77           | 6.77              | 6.77       | 0.00      |
| Galvanized Steel | 7.46                 | 7.46           | 7.46              | 7.46       | 0.00      |
| Glass            | 7.17                 | 7.18           | 7.17              | 7.17       | 0.00      |
| Drywall          | 7.45                 | 7.45           | 7.45              | 7.45       | 0.00      |
| Laminate         | 7.54                 | 7.54           | 7.55              | 7.54       | 0.01      |
| Wood             | 7.90                 | 7.89           | 7.86              | 7.88       | 0.02      |
| <b>C3</b>        |                      |                |                   |            |           |
| Carpet           | 7.60                 | 7.59           | 7.60              | 7.60       | 0.01      |
| Ceiling Tile     | 6.66                 | 6.66           | 6.66              | 6.66       | 0.00      |
| Galvanized Steel | 7.36                 | 7.35           | 7.35              | 7.35       | 0.01      |
| Glass            | 7.33                 | 7.33           | 7.21              | 7.29       | 0.07      |
| Drywall          | 7.67                 | 7.55           | 7.68              | 7.63       | 0.07      |
| Laminate         | 7.80                 | 7.79           | 7.80              | 7.80       | 0.01      |
| Wood             | 7.78                 | 7.77           | 7.78              | 7.78       | 0.00      |
| <b>C4</b>        |                      |                |                   |            |           |
| Carpet           | 7.50                 | 7.50           | 7.49              | 7.50       | 0.01      |
| Ceiling Tile     | 6.56                 | 6.56           | 6.56              | 6.56       | 0.00      |
| Galvanized Steel | 7.43                 | 7.43           | 7.44              | 7.43       | 0.00      |
| Glass            | 7.39                 | 7.52           | 7.52              | 7.48       | 0.07      |
| Drywall          | 7.36                 | 7.36           | 7.35              | 7.36       | 0.01      |
| Laminate         | 7.47                 | 7.46           | 7.46              | 7.46       | 0.00      |
| Wood             | 7.73                 | 7.78           | 7.77              | 7.76       | 0.03      |

| Test #           | Above Ceiling | On Desk | Under Desk | avg  | sd   |
|------------------|---------------|---------|------------|------|------|
| <b>C5</b>        |               |         |            |      |      |
| Carpet           | 7.39          | 6.98    | 7.39       | 7.25 | 0.24 |
| Ceiling Tile     | 6.62          | 6.62    | 6.62       | 6.62 | 0.00 |
| Galvanized Steel | 7.48          | 7.46    | 7.46       | 7.47 | 0.01 |
| Glass            | 7.19          | 7.34    | 7.33       | 7.28 | 0.08 |
| Drywall          | 7.19          | 7.20    | 7.18       | 7.19 | 0.01 |
| Laminate         | 7.54          | 7.54    | 7.54       | 7.54 | 0.00 |
| Wood             | 7.00          | 7.53    | 7.54       | 7.36 | 0.31 |
| <b>C6</b>        |               |         |            |      |      |
| Carpet           | 6.24          | 7.59    | 6.83       | 6.89 | 0.68 |
| Ceiling Tile     | 4.67          | 5.32    | 4.57       | 4.85 | 0.41 |
| Galvanized steel | 7.47          | 7.48    | 4.90       | 6.62 | 1.48 |
| Glass            | 7.75          | 7.74    | 7.74       | 7.74 | 0.00 |
| Drywall          | 7.58          | 7.46    | 7.46       | 7.50 | 0.07 |
| Laminate         | 6.92          | 7.56    | 6.92       | 7.13 | 0.37 |
| Wood             | 7.89          | 7.88    | 7.89       | 7.89 | 0.01 |
| <b>C7</b>        |               |         |            |      |      |
| Carpet           | 5.68          | 4.88    | 6.91       | 5.83 | 1.02 |
| Ceiling Tile     | 5.07          | 5.29    | 6.77       | 5.71 | 0.92 |
| Galvanized steel | 2.80          | 6.68    | 2.65       | 4.04 | 2.29 |
| Glass            | 5.79          | 7.38    | 6.93       | 6.70 | 0.82 |
| Drywall          | 3.97          | 6.00    | 6.63       | 5.53 | 1.39 |
| Laminate         | 7.30          | 6.16    | 7.60       | 7.02 | 0.76 |
| Wood             | 7.78          | 7.77    | 7.30       | 7.62 | 0.27 |
| <b>C8</b>        |               |         |            |      |      |
| Carpet           | 7.50          | 7.81    | 7.80       | 7.70 | 0.17 |
| Ceiling Tile     | 5.80          | 6.62    | 6.62       | 6.35 | 0.48 |
| Galvanized steel | 7.29          | 7.42    | 5.66       | 6.79 | 0.98 |
| Glass            | 7.15          | 7.27    | 7.15       | 7.19 | 0.07 |
| Drywall          | 7.29          | 5.96    | 7.42       | 6.89 | 0.81 |
| Laminate         | 7.55          | 7.55    | 7.55       | 7.55 | 0.00 |
| Wood             | 7.69          | 7.55    | 7.71       | 7.65 | 0.09 |

| Test #           | Above Ceiling | On Desk | Under Desk | avg  | sd   |
|------------------|---------------|---------|------------|------|------|
| <b>C9</b>        |               |         |            |      |      |
| Carpet           | 3.65          | 7.63    | 6.98       | 6.08 | 2.13 |
| Ceiling Tile     | 6.56          | 6.68    | 6.68       | 6.64 | 0.07 |
| Galvanized steel | 4.59          | 6.88    | 6.88       | 6.12 | 1.32 |
| Glass            | 6.40          | 7.22    | 4.87       | 6.16 | 1.19 |
| Drywall          | 6.99          | 5.44    | 7.34       | 6.59 | 1.01 |
| Laminate         | 7.30          | 7.30    | 7.29       | 7.30 | 0.00 |
| Wood             | 7.34          | 7.35    | 7.24       | 7.31 | 0.06 |

|                  |      |      |      |      |      |
|------------------|------|------|------|------|------|
| <b>C10</b>       |      |      |      |      |      |
| Carpet           | 7.75 | 7.75 | 7.74 | 7.75 | 0.00 |
| Ceiling Tile     | 6.23 | 6.66 | 6.66 | 6.52 | 0.25 |
| Galvanized steel | 3.41 | 5.79 | 7.41 | 5.54 | 2.02 |
| Glass            | 6.47 | 6.23 | 7.59 | 6.76 | 0.73 |
| Drywall          | 5.75 | 7.41 | 6.28 | 6.48 | 0.85 |
| Laminate         | 7.63 | 7.62 | 7.63 | 7.63 | 0.00 |
| Wood             | 7.63 | 7.66 | 7.63 | 7.64 | 0.02 |

LR values in red signify complete inactivation of spores for the 3 replicates at a particular chamber location
